# Supplementary material for: Comparing azathioprine with cyclosporine in the treatment of antihistamine refractory chronic spontaneous urticaria: A randomized prospective active-controlled non-inferiority study
Source: PubMed Central journal article supplement — World Allergy Organ J. 2019 May 10;12(5):100033. doi: 10.1016/j.waojou.2019.100033 (PMC6518319; doi:10.1016/j.waojou.2019.100033), 2019-05-10
Supplement: mmc1.pdf [file mmc1.pdf]

| <b>CTRI No</b>                                                                                                                                             | <b>CTRI/2017/08/009213</b> [Registered on: 01/08/2017] Trial Registered Retrospectively                                                                                                                                                                                                                                                                                                                                                                                                                                                                               |  |              |                            |                    |                                  |                    |                   |                |                                                                                            |              |            |            |  |              |                                 |
|------------------------------------------------------------------------------------------------------------------------------------------------------------|-----------------------------------------------------------------------------------------------------------------------------------------------------------------------------------------------------------------------------------------------------------------------------------------------------------------------------------------------------------------------------------------------------------------------------------------------------------------------------------------------------------------------------------------------------------------------|--|--------------|----------------------------|--------------------|----------------------------------|--------------------|-------------------|----------------|--------------------------------------------------------------------------------------------|--------------|------------|------------|--|--------------|---------------------------------|
| <b>Acknowledgement Number</b>                                                                                                                              | REF/2017/04/014154                                                                                                                                                                                                                                                                                                                                                                                                                                                                                                                                                    |  |              |                            |                    |                                  |                    |                   |                |                                                                                            |              |            |            |  |              |                                 |
| <b>Last Modified On:</b>                                                                                                                                   | 02/08/2017                                                                                                                                                                                                                                                                                                                                                                                                                                                                                                                                                            |  |              |                            |                    |                                  |                    |                   |                |                                                                                            |              |            |            |  |              |                                 |
| <b>Post Graduate Thesis</b>                                                                                                                                | Yes                                                                                                                                                                                                                                                                                                                                                                                                                                                                                                                                                                   |  |              |                            |                    |                                  |                    |                   |                |                                                                                            |              |            |            |  |              |                                 |
| <b>Type of Trial</b>                                                                                                                                       | Interventional                                                                                                                                                                                                                                                                                                                                                                                                                                                                                                                                                        |  |              |                            |                    |                                  |                    |                   |                |                                                                                            |              |            |            |  |              |                                 |
| <b>Type of Study</b>                                                                                                                                       | Drug                                                                                                                                                                                                                                                                                                                                                                                                                                                                                                                                                                  |  |              |                            |                    |                                  |                    |                   |                |                                                                                            |              |            |            |  |              |                                 |
| <b>Study Design</b>                                                                                                                                        | Randomized, Parallel Group, Active Controlled Trial                                                                                                                                                                                                                                                                                                                                                                                                                                                                                                                   |  |              |                            |                    |                                  |                    |                   |                |                                                                                            |              |            |            |  |              |                                 |
| <b>Public Title of Study</b><br><u>Clarification(s) with Reply</u><br><u>Modification(s)</u>                                                               | Assessing and comparing efficacy of cyclosporine versus azathioprine in CRU                                                                                                                                                                                                                                                                                                                                                                                                                                                                                           |  |              |                            |                    |                                  |                    |                   |                |                                                                                            |              |            |            |  |              |                                 |
| <b>Scientific Title of Study</b><br><u>Clarification(s) with Reply</u><br><u>Modification(s)</u>                                                           | A randomized study to assess and compare the efficacy of cyclosporine versus azathioprine in the treatment of chronic refractory urticaria.                                                                                                                                                                                                                                                                                                                                                                                                                           |  |              |                            |                    |                                  |                    |                   |                |                                                                                            |              |            |            |  |              |                                 |
| <b>Acronym</b>                                                                                                                                             |                                                                                                                                                                                                                                                                                                                                                                                                                                                                                                                                                                       |  |              |                            |                    |                                  |                    |                   |                |                                                                                            |              |            |            |  |              |                                 |
| <b>Secondary IDs if Any</b>                                                                                                                                | <table border="1"> <thead> <tr> <th>Secondary ID</th> <th>Identifier</th> </tr> </thead> <tbody> <tr> <td>NIL</td> <td>NIL</td> </tr> </tbody> </table>                                                                                                                                                                                                                                                                                                                                                                                                               |  | Secondary ID | Identifier                 | NIL                | NIL                              |                    |                   |                |                                                                                            |              |            |            |  |              |                                 |
| Secondary ID                                                                                                                                               | Identifier                                                                                                                                                                                                                                                                                                                                                                                                                                                                                                                                                            |  |              |                            |                    |                                  |                    |                   |                |                                                                                            |              |            |            |  |              |                                 |
| NIL                                                                                                                                                        | NIL                                                                                                                                                                                                                                                                                                                                                                                                                                                                                                                                                                   |  |              |                            |                    |                                  |                    |                   |                |                                                                                            |              |            |            |  |              |                                 |
| <b>Details of Principal Investigator or overall Trial Coordinator (multi-center study)</b><br><u>Clarification(s) with Reply</u><br><u>Modification(s)</u> | <table border="1"> <tr> <td><b>Name</b></td> <td>Dr Yashdeep singh pathania</td> </tr> <tr> <td><b>Designation</b></td> <td>Junior resident (md dermatology)</td> </tr> <tr> <td><b>Affiliation</b></td> <td>Pgimer chandigarh</td> </tr> <tr> <td><b>Address</b></td> <td>Department of dermatology pgimer chandigarh<br/>Chandigarh<br/>CHANDIGARH<br/>160012<br/>India</td> </tr> <tr> <td><b>Phone</b></td> <td>8894480089</td> </tr> <tr> <td><b>Fax</b></td> <td></td> </tr> <tr> <td><b>Email</b></td> <td>yashdeepsinghpathania@gmail.com</td> </tr> </table> |  | <b>Name</b>  | Dr Yashdeep singh pathania | <b>Designation</b> | Junior resident (md dermatology) | <b>Affiliation</b> | Pgimer chandigarh | <b>Address</b> | Department of dermatology pgimer chandigarh<br>Chandigarh<br>CHANDIGARH<br>160012<br>India | <b>Phone</b> | 8894480089 | <b>Fax</b> |  | <b>Email</b> | yashdeepsinghpathania@gmail.com |
| <b>Name</b>                                                                                                                                                | Dr Yashdeep singh pathania                                                                                                                                                                                                                                                                                                                                                                                                                                                                                                                                            |  |              |                            |                    |                                  |                    |                   |                |                                                                                            |              |            |            |  |              |                                 |
| <b>Designation</b>                                                                                                                                         | Junior resident (md dermatology)                                                                                                                                                                                                                                                                                                                                                                                                                                                                                                                                      |  |              |                            |                    |                                  |                    |                   |                |                                                                                            |              |            |            |  |              |                                 |
| <b>Affiliation</b>                                                                                                                                         | Pgimer chandigarh                                                                                                                                                                                                                                                                                                                                                                                                                                                                                                                                                     |  |              |                            |                    |                                  |                    |                   |                |                                                                                            |              |            |            |  |              |                                 |
| <b>Address</b>                                                                                                                                             | Department of dermatology pgimer chandigarh<br>Chandigarh<br>CHANDIGARH<br>160012<br>India                                                                                                                                                                                                                                                                                                                                                                                                                                                                            |  |              |                            |                    |                                  |                    |                   |                |                                                                                            |              |            |            |  |              |                                 |
| <b>Phone</b>                                                                                                                                               | 8894480089                                                                                                                                                                                                                                                                                                                                                                                                                                                                                                                                                            |  |              |                            |                    |                                  |                    |                   |                |                                                                                            |              |            |            |  |              |                                 |
| <b>Fax</b>                                                                                                                                                 |                                                                                                                                                                                                                                                                                                                                                                                                                                                                                                                                                                       |  |              |                            |                    |                                  |                    |                   |                |                                                                                            |              |            |            |  |              |                                 |
| <b>Email</b>                                                                                                                                               | yashdeepsinghpathania@gmail.com                                                                                                                                                                                                                                                                                                                                                                                                                                                                                                                                       |  |              |                            |                    |                                  |                    |                   |                |                                                                                            |              |            |            |  |              |                                 |
